# Supplementary material
Source: PubMed Central journal article supplement (PMC1250287)
Supplement: pbio.0030324.sd001.pdf [file pbio.0030324.sd001.pdf]

## Supporting on-line material

**Chemical synthesis.** Treatment of **1** [1] with trifluoroacetic acid followed by coupling with Boc-L-Val-L-Phg-OH (**2**) mediated by HATU afforded **12** with 83% yield (Scheme 1). Next, the Boc protecting group in **12** was removed, and liberated amine was coupled with 5-methylisoxale-3-carboxylic acid (**3**) to produce **14** with 96% yield. Following similar procedures, the other six compounds in Table 2 were prepared.

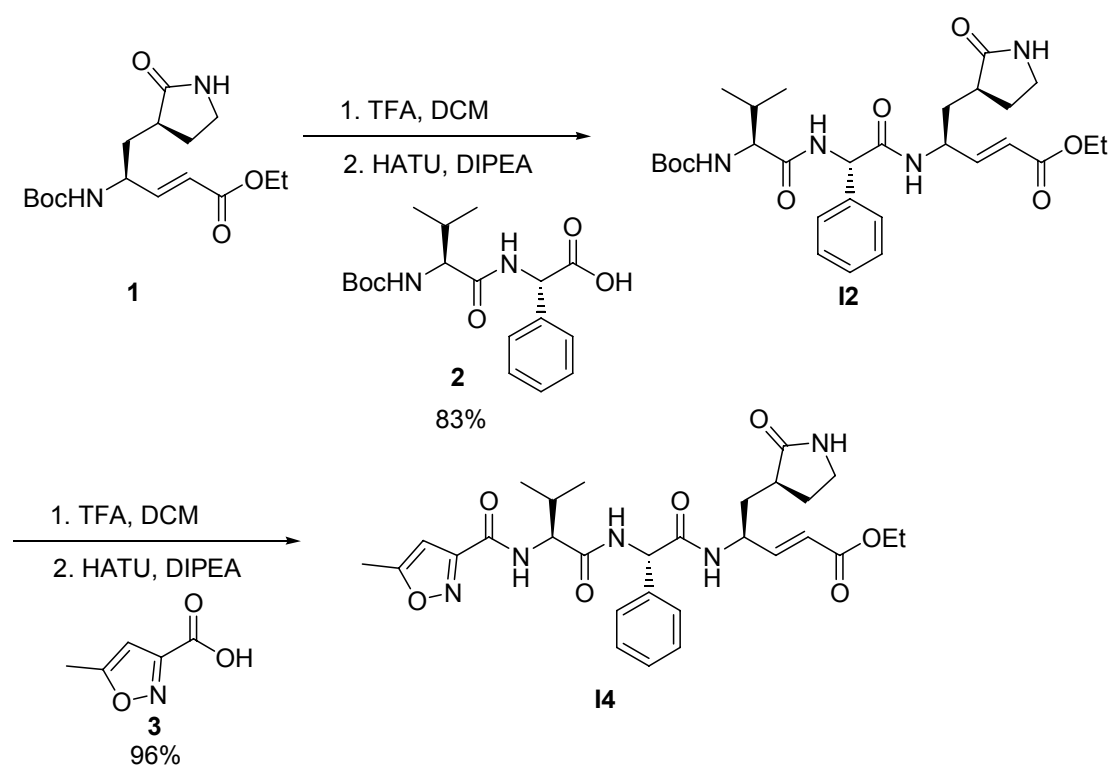

**Scheme 1**

The general synthesis protocol for **N3** and compounds listed in Table 3 is depicted by the preparation of **N1** and **N2** (Scheme 2). After removal of the Boc protecting group in (**1**), coupling with Boc protected tripeptide acid (**4**) was carried out to produce **N2** with 81% yield. Switching the *N*-substituent was accompanied with treatment of **N2** with trifluoroacetic acid and coupling with 5-methylisoxale-3-carboxylic acid (**3**) to provide **N1** with 82% yield.

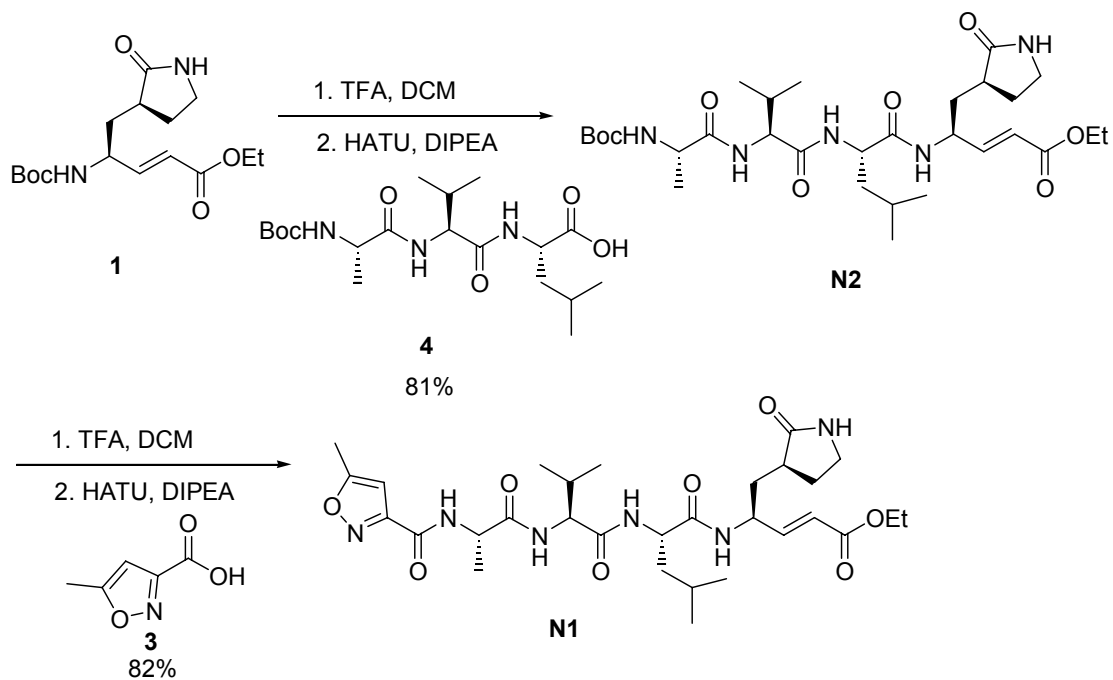

**Scheme 2**

## Reference

1. Tian Q, Nayyar NK, Babu S, Chen L, Tao J, et al. (2001) An efficient synthesis of a key intermediate for the preparation of the rhinovirus protease inhibitor AG7088 via asymmetric dianionic cyanomethylation of N-Boc--(+)-glutamic acid dimethyl ester. *Tetrahedron Letters* 42: 6807-6809.
