# Supplementary material
Source: PubMed Central journal article supplement (PMC1250287)
Supplement: pbio.0030324.st001.pdf [file pbio.0030324.st001.pdf]

**Table 1: Data collection and refinement statistics**

| <b>Data collection statistics</b>  |                                  |                                  |                                  |                                  |                                               |
|------------------------------------|----------------------------------|----------------------------------|----------------------------------|----------------------------------|-----------------------------------------------|
|                                    | <b>SARS-CoV M<sup>pro</sup></b>  |                                  |                                  |                                  | <b>TGEV M<sup>pro</sup></b>                   |
|                                    | <b>I2</b>                        | <b>N1</b>                        | <b>N3</b>                        | <b>N9</b>                        | <b>N1</b>                                     |
| Wavelength (Å)                     | 1.5418                           | 1.5418                           | 1.5418                           | 1.5418                           | 1.5418                                        |
| Space group                        | P2 <sub>1</sub>                  | P2 <sub>1</sub>                  | P2 <sub>1</sub>                  | P2 <sub>1</sub>                  | P2 <sub>1</sub> 2 <sub>1</sub> 2 <sub>1</sub> |
| Unit cell (Å, °)                   | a=50.7 Å<br>b=94.7 Å<br>c=66.2 Å | a=51.7 Å<br>b=95.3 Å<br>c=67.5 Å | a=52.1 Å<br>b=95.7 Å<br>c=67.6 Å | a=52.1 Å<br>b=95.0 Å<br>c=67.6 Å | a=66.6 Å<br>b=90.2 Å<br>c=110.3 Å             |
|                                    | β=103.0°                         | β=103.6°                         | β=102.9°                         | β=103.1°                         |                                               |
| Resolution limit (Å)               | 50.0 – 2.7<br>(2.8 – 2.70)       | 50.0 – 2.0<br>(2.08 – 2.0)       | 50.0 – 2.3<br>(2.34 – 2.3)       | 50.0 – 1.85<br>(1.93 – 1.85)     | 50.0 – 2.7<br>(2.75 – 2.7)                    |
| Total reflections                  | 62,720                           | 312,221                          | 217,524                          | 246,270                          | 229,389                                       |
| Unique reflections                 | 16,799                           | 42,325                           | 28,372                           | 53,796                           | 18,149                                        |
| Completeness                       | 99.8 (99.6)                      | 99.8 (99.7)                      | 98.0 (96.0)                      | 99.9 (99.5)                      | 96.2 (92.9)                                   |
| R <sub>merge</sub> <sup>a</sup>    | 9.5 (38.0)                       | 7.8 (31.4)                       | 12.0 (52.9)                      | 8.3 (44.7)                       | 12.8 (65.2)                                   |
| <I/σ(I)>                           | 7.7 (2.5)                        | 13.0 (3.9)                       | 10.0 (3.3)                       | 8.4 (2.1)                        | 12.4 (3.8)                                    |
| Redundancy                         | 3.7 (3.7)                        | 7.4 (7.0)                        | 7.7 (7.7)                        | 4.6 (4.4)                        | 12.6 (12.8)                                   |
| <b>Refinement statistics</b>       |                                  |                                  |                                  |                                  |                                               |
|                                    | <b>I2</b>                        | <b>N1</b>                        | <b>N3</b>                        | <b>N9</b>                        | <b>N1</b>                                     |
| Resolution range (Å)               | 30.0 – 2.7                       | 30.0 – 2.0                       | 30.0 – 2.3                       | 30.0 – 1.85                      | 30.0 – 2.7                                    |
| R <sub>work</sub> <sup>b</sup> (%) | 20.9                             | 20.1                             | 19.4                             | 21.5                             | 23.4                                          |
| R <sub>free</sub> <sup>b</sup> (%) | 28.2                             | 23.9                             | 23.0                             | 24.5                             | 27.1                                          |
| RMS deviation:                     |                                  |                                  |                                  |                                  |                                               |
| bonds (Å)                          | 0.010                            | 0.012                            | 0.016                            | 0.006                            | 0.02                                          |
| angles (°)                         | 1.52                             | 1.89                             | 1.97                             | 1.43                             | 1.94                                          |
| Ramachandran plot                  |                                  |                                  |                                  |                                  |                                               |
| favored (%)                        | 79.5                             | 89.8                             | 86.7                             | 89.5                             | 76.2                                          |
| allowed (%)                        | 18.9                             | 9.0                              | 12.2                             | 9.0                              | 21.3                                          |
| generously allowed (%)             | 1.0                              | 0.8                              | 0.8                              | 1.1                              | 2.3                                           |
| disallowed (%)                     | 0.6                              | 0.4                              | 0.4                              | 0.4                              | 0.2                                           |

<sup>a</sup>R<sub>merge</sub> =  $\sum_h \sum_l |I_{ih} - \langle I_h \rangle| / \sum_h \sum_l \langle I_h \rangle$ , where  $\langle I_h \rangle$  is the mean of the observations  $I_{ih}$  of reflection  $h$ .

<sup>b</sup>R<sub>work</sub> =  $\sum (|F_p(\text{obs})| - |F_p(\text{calc})|) / \sum |F_p(\text{obs})|$ ; R<sub>free</sub> = R factor for a selected subset (10%) of the reflections that was not included in prior refinement calculation.
