# Supplementary material
Source: PubMed Central journal article supplement (PMC1250287)
Supplement: pbio.0030324.st003.pdf [file pbio.0030324.st003.pdf]

**Table 3: Representative inhibitors designed in the second round (N1 and N3 not shown here)**

| Compound No. <sup>a</sup> | R <sub>5</sub>       | R <sub>6</sub>  | R <sub>7</sub>  | R <sub>8</sub>  | R <sub>9</sub> |
|---------------------------|----------------------|-----------------|-----------------|-----------------|----------------|
| N2                        | <i>tert</i> -Butoxyl | Me              | <sup>i</sup> Pr | <sup>i</sup> Bu | Et             |
| N4                        | <i>tert</i> -Butoxyl | Me              | <sup>i</sup> Pr | <sup>i</sup> Bu | Bn             |
| N5                        |                      | <sup>i</sup> Pr | <sup>i</sup> Pr | Ph              | Et             |
| N9                        |                      | <sup>i</sup> Pr | <sup>i</sup> Pr | <sup>i</sup> Bu | Et             |
| N14                       |                      | Bn              | <sup>i</sup> Pr | <sup>i</sup> Bu | Et             |
| N15                       |                      | <sup>i</sup> Bu | <sup>i</sup> Pr | <sup>i</sup> Bu | Et             |
| N10                       |                      | <sup>i</sup> Pr | <sup>i</sup> Pr | <sup>i</sup> Bu |                |

<sup>a</sup> In preliminary inhibition assays for SARS-CoV M<sup>pro</sup>, the compounds in this table (except N9) were less effective than N1, N3 and N9 and their accurate inhibition kinetic parameters were not determined.
