# Supplementary material
Source: PubMed Central journal article supplement (PMC1250287)

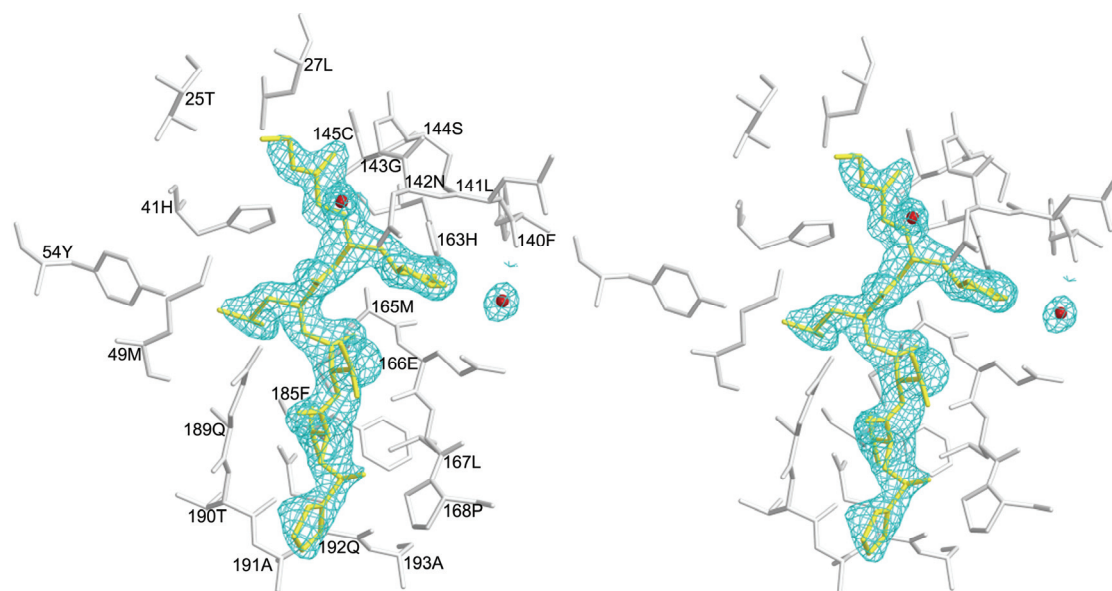

Supplement: pbio.0030324.sg001.pdf [file pbio.0030324.sg001.pdf]

**A.**

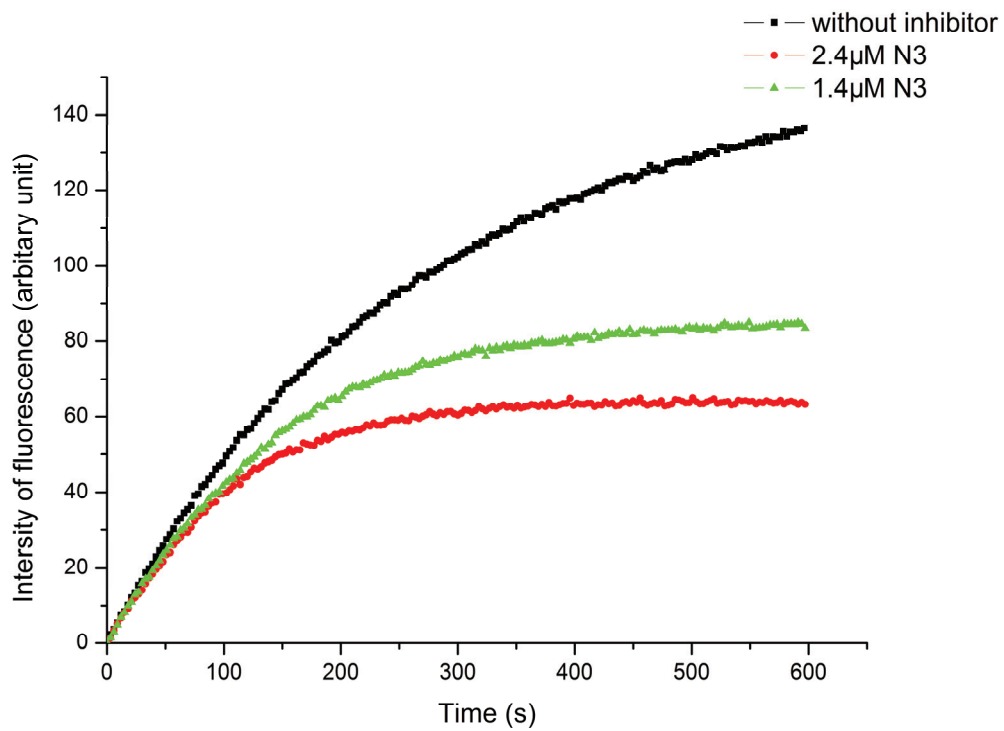

**B.**

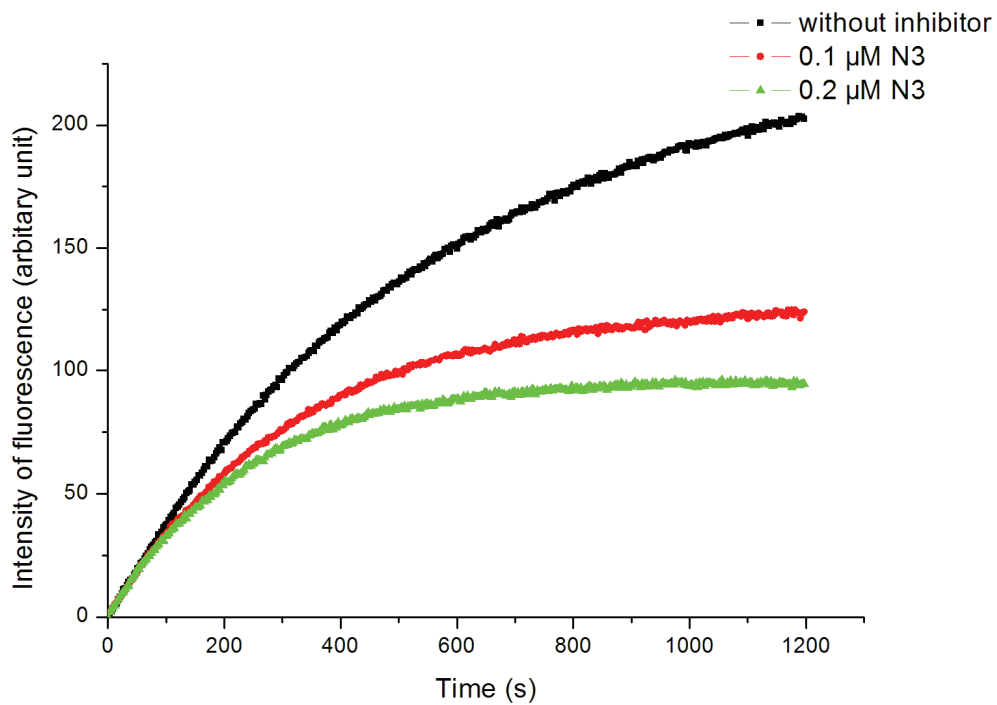

**C.**

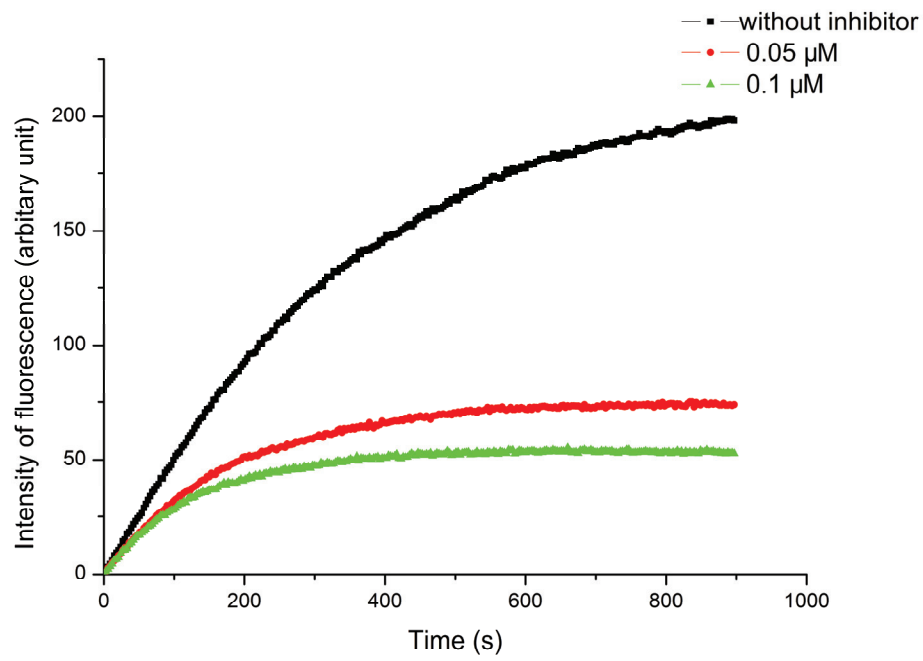

**D.**

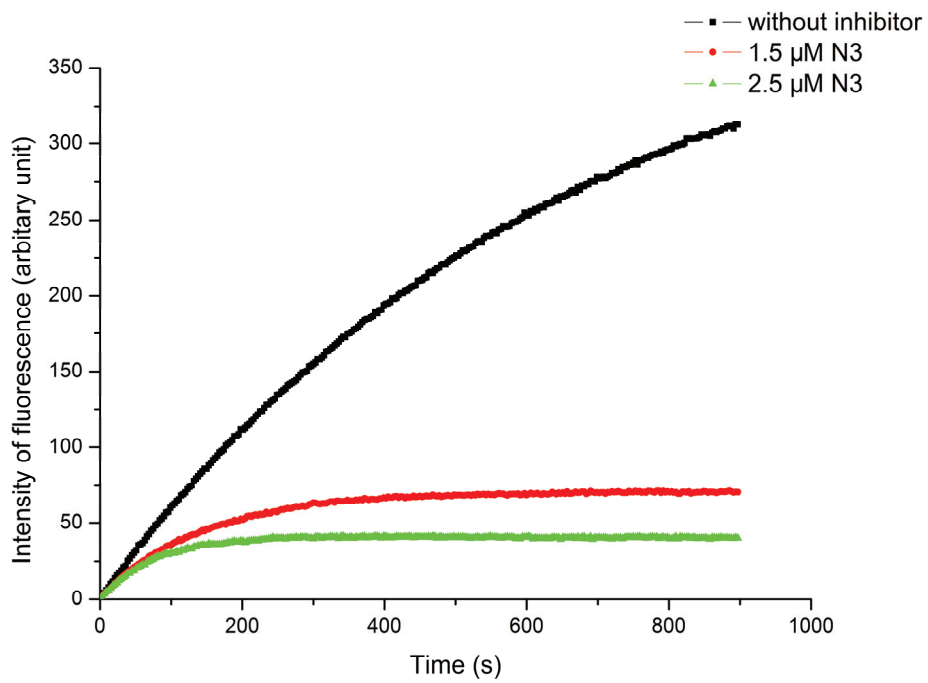

**E.**

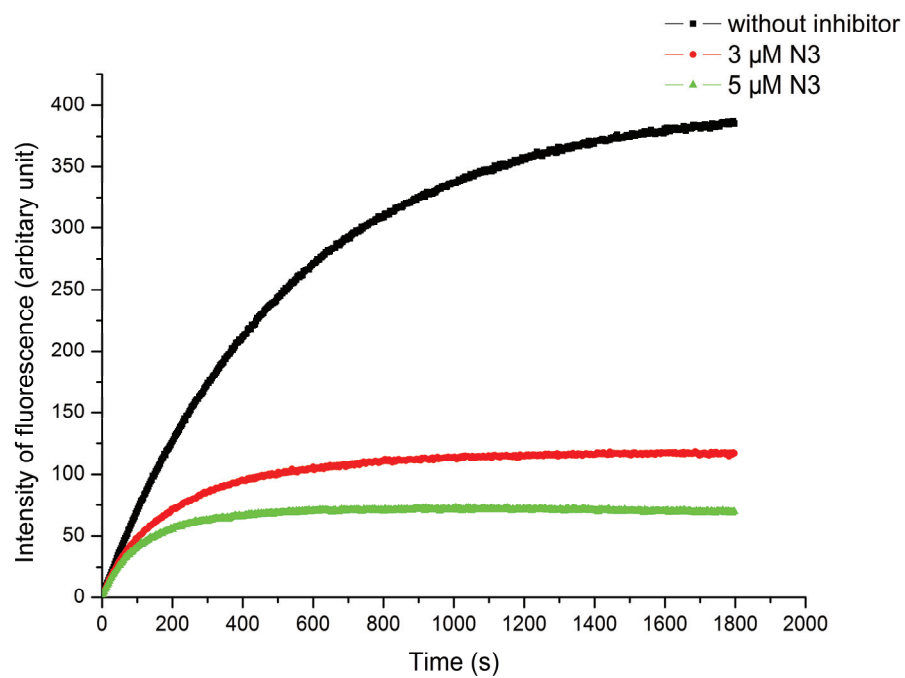

**F.**

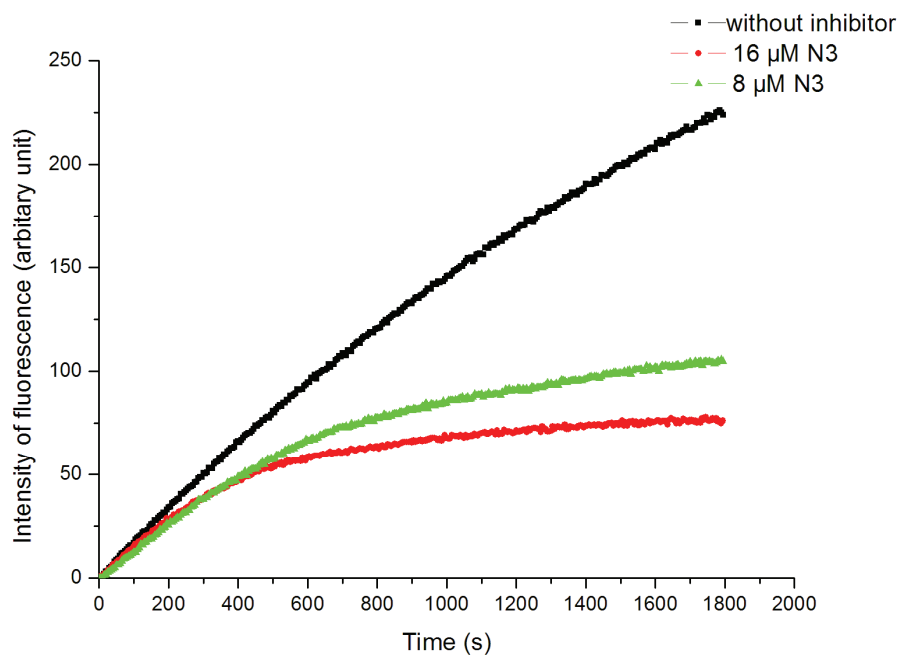

**G.**

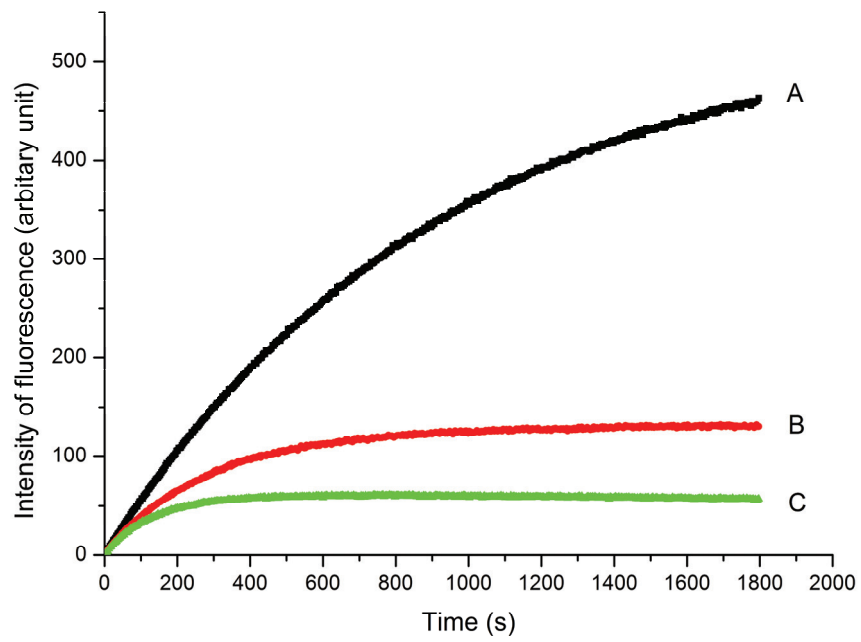

**H.**

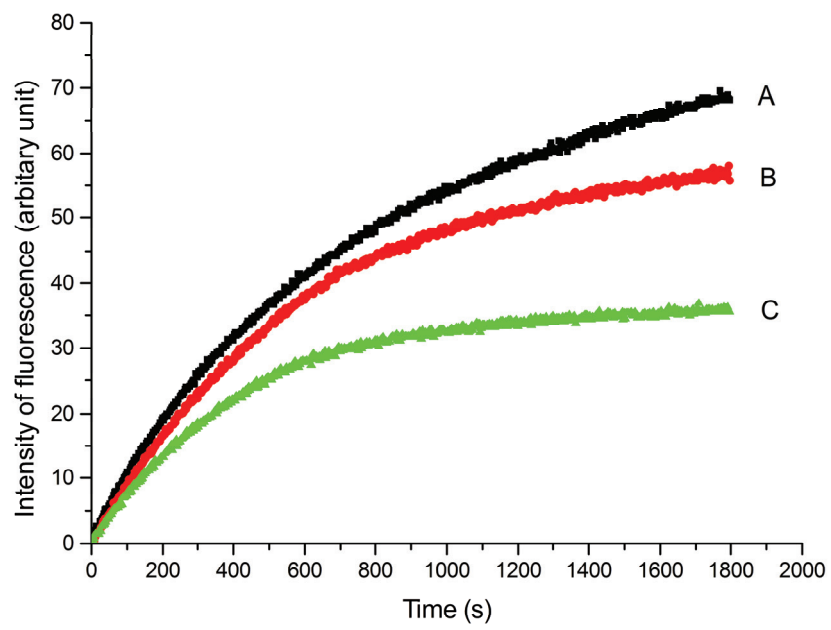

Supplement: pbio.0030324.sg002.pdf [file pbio.0030324.sg002.pdf]

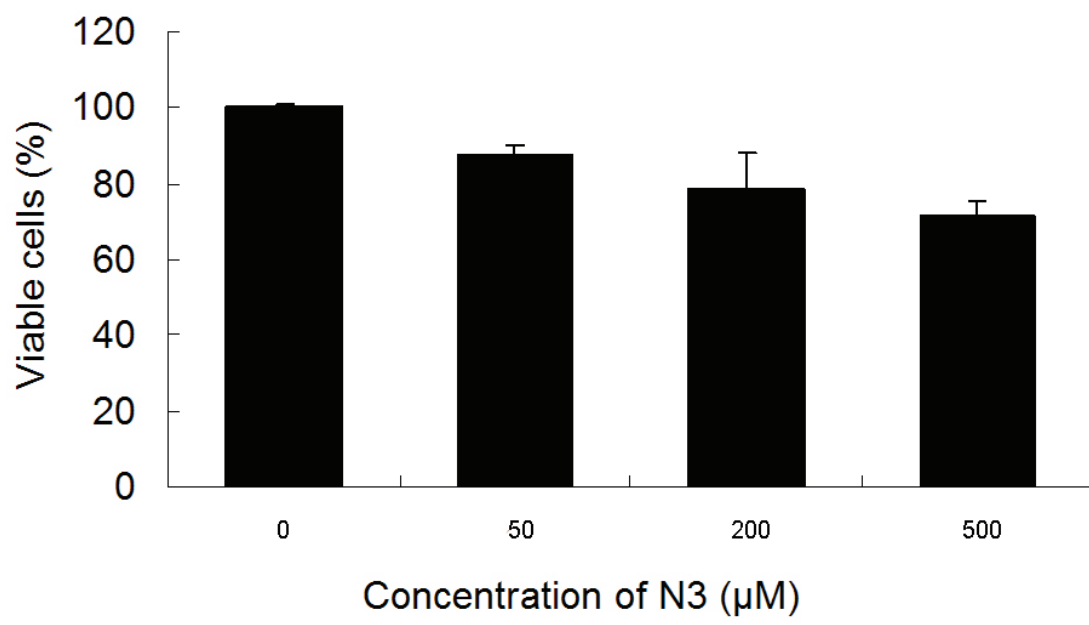

Supplement: pbio.0030324.sg003.pdf [file pbio.0030324.sg003.pdf]
